# Supplementary material for: Investigation of the Stability and Hydrogen Evolution Activity of Dual-Atom Catalysts on Nitrogen-Doped Graphene
Source: MDPI journal article supplement (doi:10.3390/nano12152557), 2022-07-25
Supplement: s1 [file s1]

## Supplementary Material

# Investigation of the Stability and Hydrogen Evolution Activity of Dual-Atom Catalysts on Nitrogen-Doped Graphene

Qiansong Zhou <sup>1,2</sup>, Meng Zhang <sup>3</sup>, Beien Zhu <sup>1,4,\*</sup> and Yi Gao <sup>1,4,\*</sup>

<sup>1</sup> Key Laboratory of Interfacial Physics and Technology, Shanghai Institute of Applied Physics, Chinese Academy of Sciences, Shanghai 201800, China; zhouqiansong@sinap.ac.cn

<sup>2</sup> University of Chinese Academy of Sciences, Beijing 100049, China

<sup>3</sup> Department of Physics, School of Physical Science and Technology, Ningbo University, Ningbo 315211, China; zhangmeng733@126.com

<sup>4</sup> Interdisciplinary Research Center, Zhangjiang Laboratory, Shanghai Advanced Research Institute, Chinese Academy of Sciences, Shanghai 201210, China

\* Correspondence: zhubeien@zjlab.org.cn (B.Z.); gaoyi@zjlab.org.cn (Y.G.)

## Methodologies

We calculated the formation energy of two types of vacancy sites in graphene substrate structures to determine their stability ( $E_f$ ) [54]:

$$E_f = E_{sub} + x\mu_C - E_G - y\mu_N \quad (1)$$

In the formula,  $E_{sub}$  is the total energy of SVGN<sub>3</sub> or 4N-doped double-vacancies graphene (DVG<sub>N4</sub>);  $E_G$  is the total energy of pristine graphene substrate structure;  $x$  is the number of carbon atoms that were removed from the pristine graphene;  $\mu_C$  is the chemical potential of carbon, defined as the total energy of each carbon atom in the pristine graphene;  $y$  is the number of embedded N atoms;  $\mu_N$  is the chemical potential of nitrogen (defined as half of the total energy of the N<sub>2</sub> molecule). As the formation energy of SVGN<sub>3</sub> is 3.50 eV [55] and that of DVG<sub>N4</sub> is 3.88 eV, we will choose SVGN<sub>3</sub> as the study object.

## Tables

**Table S1.** Testing the binding energy ( $E_b$ ) under several functional (PBE, RPBE, PBE+D3) for 3d elements.

|                                 | $E_b/\text{eV(PBE)}$ | $E_b/\text{eV(RPBE)}$ | $E_b/\text{eV(PBE+D3)}$ |
|---------------------------------|----------------------|-----------------------|-------------------------|
| TiG                             | -1.98                | -1.28                 | -1.98                   |
| TiGN <sub>3</sub>               | -6.29                | -5.94                 | -6.45                   |
| Ti <sub>2</sub> GN <sub>3</sub> | -9.92                | -8.90                 | -9.92                   |
| VG                              | -1.20                | -0.84                 | -1.20                   |
| VGN <sub>3</sub>                | -5.80                | -5.32                 | -5.80                   |
| V <sub>2</sub> GN <sub>3</sub>  | -7.79                | -6.84                 | -7.79                   |
| CrG                             | -0.31                | -0.09                 | -0.31                   |
| CrGN <sub>3</sub>               | -3.73                | -3.25                 | -3.73                   |
| Cr <sub>2</sub> GN <sub>3</sub> | -5.70                | -4.71                 | -5.70                   |
| MnG                             | -0.23                | 0.04                  | -0.27                   |
| MnGN <sub>3</sub>               | -3.98                | -3.51                 | -3.98                   |
| Mn <sub>2</sub> GN <sub>3</sub> | -5.75                | -3.99                 | -5.75                   |
| FeG                             | -1.17                | -0.49                 | 1.13                    |
| FeGN <sub>3</sub>               | -4.57                | -3.67                 | -4.82                   |
| Fe <sub>2</sub> GN <sub>3</sub> | -7.21                | -4.95                 | -7.15                   |
| CoG                             | -1.24                | -0.99                 | -1.17                   |
| CoGN <sub>3</sub>               | -4.96                | -4.65                 | -4.89                   |
| Co <sub>2</sub> GN <sub>3</sub> | -7.07                | -6.81                 | -6.93                   |
| NiG                             | -1.52                | -1.01                 | -1.52                   |
| NiGN <sub>3</sub>               | -4.48                | -3.90                 | -4.26                   |
| Ni <sub>2</sub> GN <sub>3</sub> | -6.58                | -5.76                 | -6.56                   |
| CuG                             | -0.29                | 0.00                  | -0.29                   |
| CuGN <sub>3</sub>               | -3.12                | -2.59                 | -3.12                   |
| Cu <sub>2</sub> GN <sub>3</sub> | -4.54                | -3.83                 | -4.50                   |

**Table S2.** The formation energy of SVGN<sub>3</sub> and DVGN<sub>4</sub>

|                      | SVGN <sub>3</sub> | DVGN <sub>4</sub> |
|----------------------|-------------------|-------------------|
| formation energy(eV) | 3.50[55]          | 3.88              |

**Table S3.** The zero-point energy (ZPE), and entropic correction (TS, T = 298.15K) of H<sub>2</sub>.

| Species        | ZPE/eV | TS/eV |
|----------------|--------|-------|
| H <sub>2</sub> | 0.269  | 0.404 |

**Table S4.** The adsorption energy ( $\Delta E_{H^*}$ ), zero-point energy difference ( $\Delta E_{ZPE}$ ), and entropic correction difference ( $T\Delta S_{H^*}$ ,  $T = 298.15K$ ), Gibbs free energy ( $\Delta G_{H^*}$ ) of H–SACs at a potential  $U = 0$ . The ZPE and entropy of the substrate are negligible.

|    | $\Delta E_{H^*}/\text{eV}$ | $\Delta E_{ZPE}/\text{eV}$ | $T\Delta S_{H^*}/\text{eV}$ | $\Delta G_{H^*}/\text{eV}$ |
|----|----------------------------|----------------------------|-----------------------------|----------------------------|
| Ti | -0.995                     | 0.0885                     | -0.189                      | -0.72                      |
| V  | -0.665                     | 0.0245                     | -0.182                      | -0.46                      |
| Cr | -0.595                     | 0.0125                     | -0.172                      | -0.41                      |
| Mn | -0.485                     | 0.0035                     | -0.196                      | -0.29                      |
| Fe | -0.675                     | 0.0175                     | -0.172                      | -0.49                      |
| Co | -0.175                     | 0.0415                     | -0.180                      | 0.05                       |
| Ni | -0.185                     | 0.0495                     | -0.191                      | 0.06                       |
| Cu | 0.095                      | 0.0425                     | -0.032                      | 0.17                       |
| Zr | -0.965                     | 0.0025                     | -0.171                      | -0.79                      |
| Nb | -1.055                     | 0.0205                     | -0.181                      | -0.85                      |
| Mo | -0.975                     | 0.0385                     | -0.187                      | -0.75                      |
| Tc | -0.765                     | 0.0425                     | -0.187                      | -0.54                      |
| Ru | -0.495                     | 0.0545                     | -0.191                      | -0.25                      |
| Rh | -0.675                     | 0.0765                     | -0.132                      | -0.47                      |
| Pd | -0.355                     | 0.0755                     | -0.194                      | -0.09                      |
| Ag | 0.365                      | 0.0235                     | -0.175                      | 0.56                       |
| Hf | -1.425                     | 0.0095                     | -0.174                      | -1.24                      |
| Ta | -1.375                     | 0.0265                     | -0.181                      | -1.17                      |
| W  | -1.425                     | 0.0435                     | -0.186                      | -1.20                      |
| Re | -1.335                     | 0.0505                     | -0.187                      | -1.10                      |
| Os | -0.975                     | 0.0405                     | -0.181                      | -0.75                      |
| Ir | -1.425                     | 0.0805                     | -0.194                      | -1.15                      |
| Pt | -1.335                     | 0.0775                     | -0.192                      | -1.07                      |
| Au | -0.935                     | 0.0645                     | -0.186                      | -0.68                      |

For H–Co1–SVGN<sub>3</sub> ( $T=298.15K$ ), (1) Geometry optimization is performed first, followed by vibration frequency calculation (releasing H atom; fixing Co, C, and N atoms), and finally, VASPKIT post-processing software calculates the zero-point energy ( $ZEP = 0.176\text{eV}$ ) and entropy ( $TS = 0.022\text{eV}$ ) of the adsorbed hydrogen. (2) Similarly, the zero-point energy ( $ZEP = 0.1345\text{ eV}$ ) and entropy ( $TS = 0.202\text{ eV}$ ) of hydrogen in the gas phase H<sub>2</sub> molecule were calculated. (3) We take the difference between the zero-point energy and the entropy of the adsorbed hydrogen and gas phase hydrogen to get  $\Delta E_{ZPE} = 0.0415\text{eV}$  and  $T\Delta S_{H^*} = -0.180\text{eV}$ . (4) According to the formula  $\Delta G_{H^*} = \Delta E_{H^*} + \Delta E_{ZPE} - T\Delta S_{H^*}$ , the Gibbs free energy of H adsorption in the H–Co1–SVGN<sub>3</sub> system is  $0.05\text{eV}$ , which is consistent with previous work.[38]

**Table S5.** The adsorption energy ( $\Delta E_{H^*}$ ), zero-point energy difference ( $\Delta E_{ZPE}$ ), and entropic correction difference ( $T\Delta S_{H^*}$ ,  $T = 298.15\text{K}$ ), Gibbs free energy ( $\Delta G_{H^*}$ ) of H–DACs at a potential  $U = 0$ . The ZPE and entropy of the substrate are negligible.

|    | $\Delta E_{H^*}/\text{eV}$ | $\Delta E_{ZPE}/\text{eV}$ | $T\Delta S_{H^*}/\text{eV}$ | $\Delta G_{H^*}/\text{eV}$ |
|----|----------------------------|----------------------------|-----------------------------|----------------------------|
| Ti | -0.595                     | 0.1595                     | -0.202                      | -0.23                      |
| V  | -1.335                     | 0.0415                     | -0.185                      | -1.11                      |
| Cr | -0.605                     | 0.0165                     | -0.178                      | -0.41                      |
| Mn | -0.345                     | 0.0325                     | -0.157                      | -0.16                      |
| Fe | -0.545                     | 0.0505                     | -0.191                      | -0.30                      |
| Co | -0.695                     | 0.0435                     | -0.184                      | -0.47                      |
| Ni | -0.935                     | 0.0425                     | -0.182                      | -0.71                      |
| Cu | -1.105                     | 0.0655                     | -0.188                      | -0.85                      |
| Zr | -0.965                     | 0.0035                     | -0.169                      | -0.79                      |
| Nb | -1.505                     | 0.0365                     | -0.189                      | -1.28                      |
| Mo | -0.655                     | 0.0165                     | -0.179                      | -0.46                      |
| Tc | -1.245                     | 0.0545                     | -0.192                      | -1.00                      |
| Ru | -0.865                     | 0.0345                     | -0.167                      | -0.66                      |
| Rh | -0.605                     | 0.0365                     | -0.191                      | -0.38                      |
| Pd | -0.685                     | 0.0405                     | -0.189                      | -0.46                      |
| Ag | -0.665                     | 0.0455                     | -0.186                      | -0.44                      |
| Hf | -1.215                     | 0.0065                     | -0.169                      | -1.04                      |
| Ta | -1.395                     | 0.0385                     | -0.189                      | -1.17                      |
| W  | -1.255                     | 0.0275                     | -0.185                      | -1.04                      |
| Re | -0.335                     | 0.0575                     | -0.189                      | -0.09                      |
| Os | -0.595                     | 0.0605                     | -0.177                      | -0.36                      |
| Ir | -0.805                     | 0.0615                     | -0.167                      | -0.58                      |
| Pt | -0.695                     | 0.0545                     | -0.170                      | -0.47                      |
| Au | -0.665                     | 0.0695                     | -0.188                      | -0.40                      |

## Figures

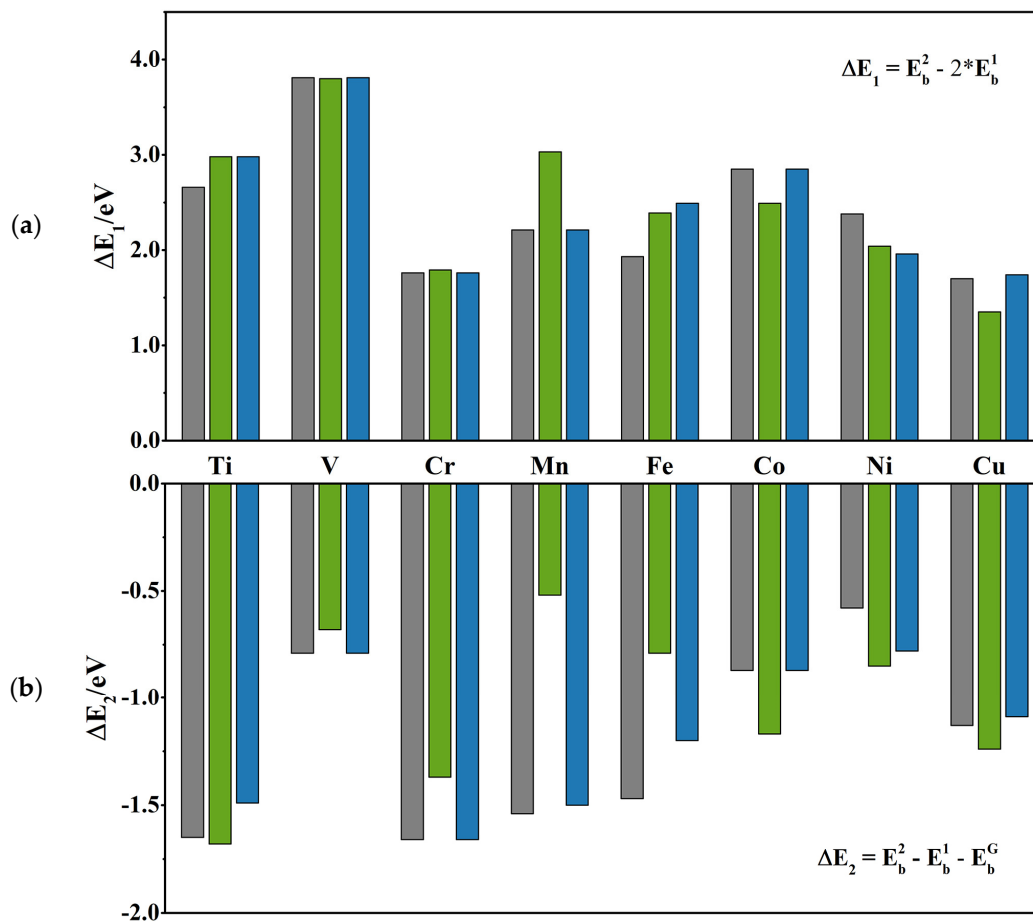

**Figure S1.** (a)  $\Delta E_1$  is the difference between  $E_b^2$  and  $2 * E_b^1$ . (b)  $\Delta E_2$  is the difference between  $E_b^2$  and  $(E_b^1 + E_b^G)$ . (Gray, green, and blue histograms represent for PBE, RPBE, and PBE+D3, respectively.)

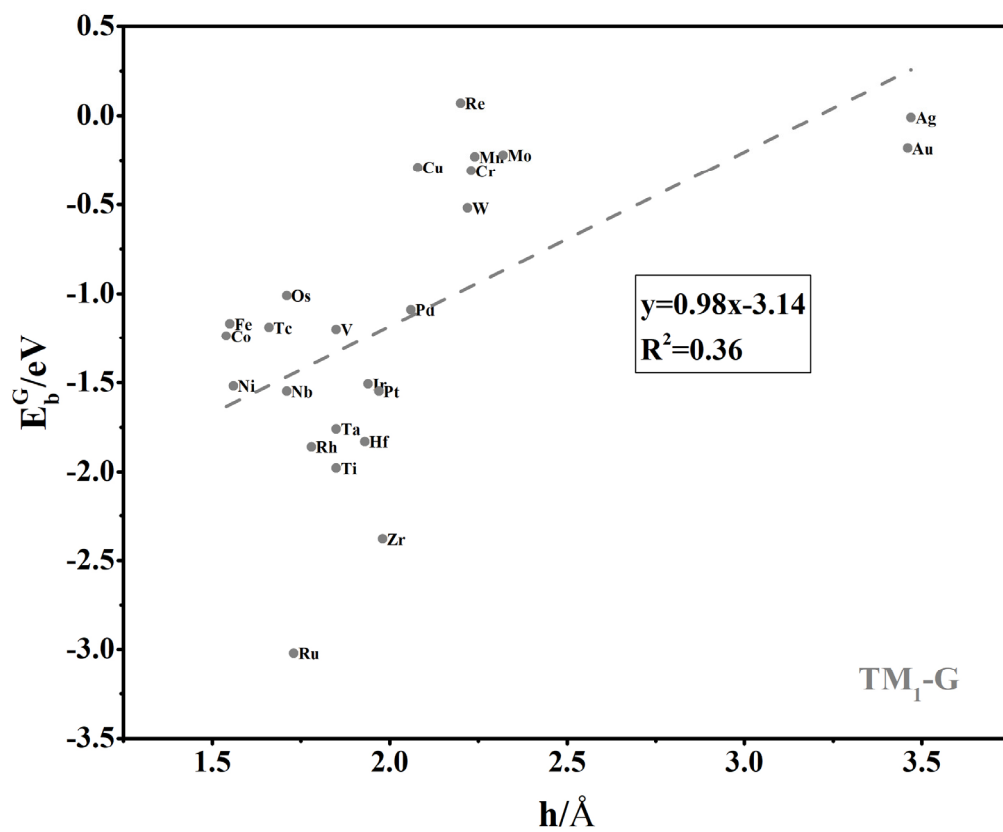

**Figure S2.** Correlation between the height ( $h$ ) from the M1 to the pure graphene and binding energy ( $E_b^G$ ) in TM<sub>1</sub>-G.

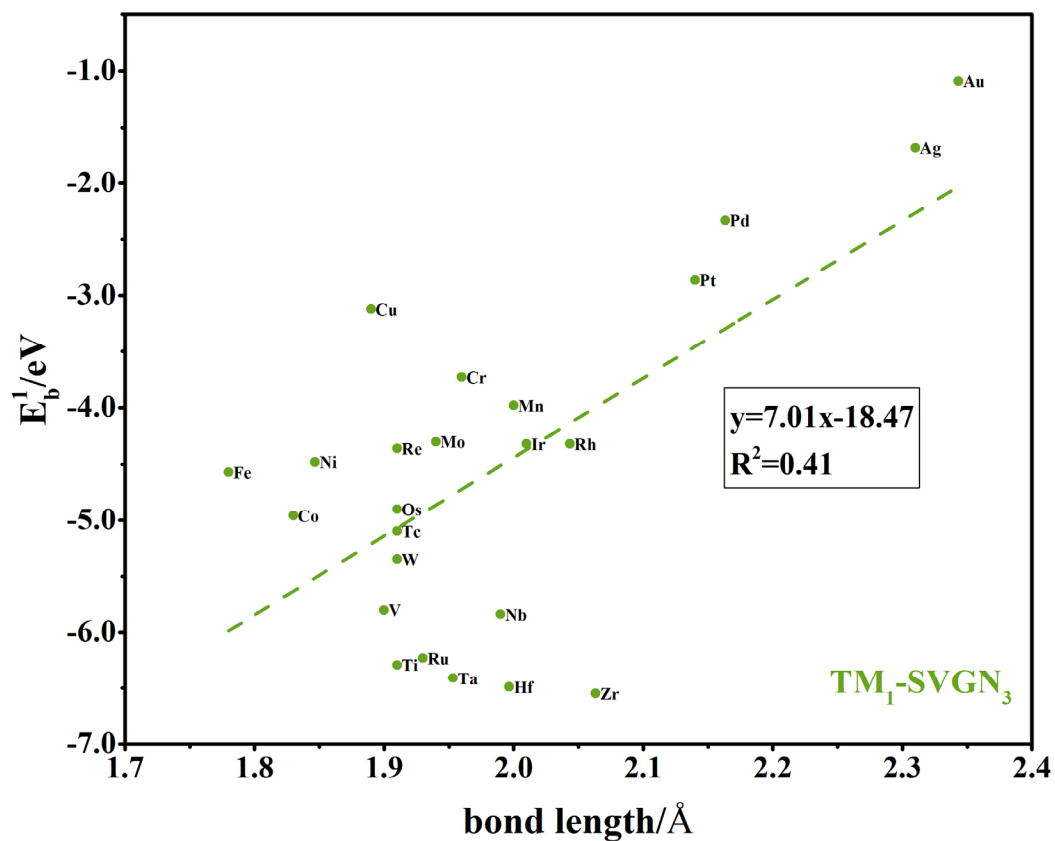

**Figure S3.** Correlation between the average distance ( $d_{\text{M1-Nx}}$ ) from the anchored M1 to the N atom and binding energy ( $E_b^1$ ) in  $\text{TM}_1\text{-SVGN}_3$ .



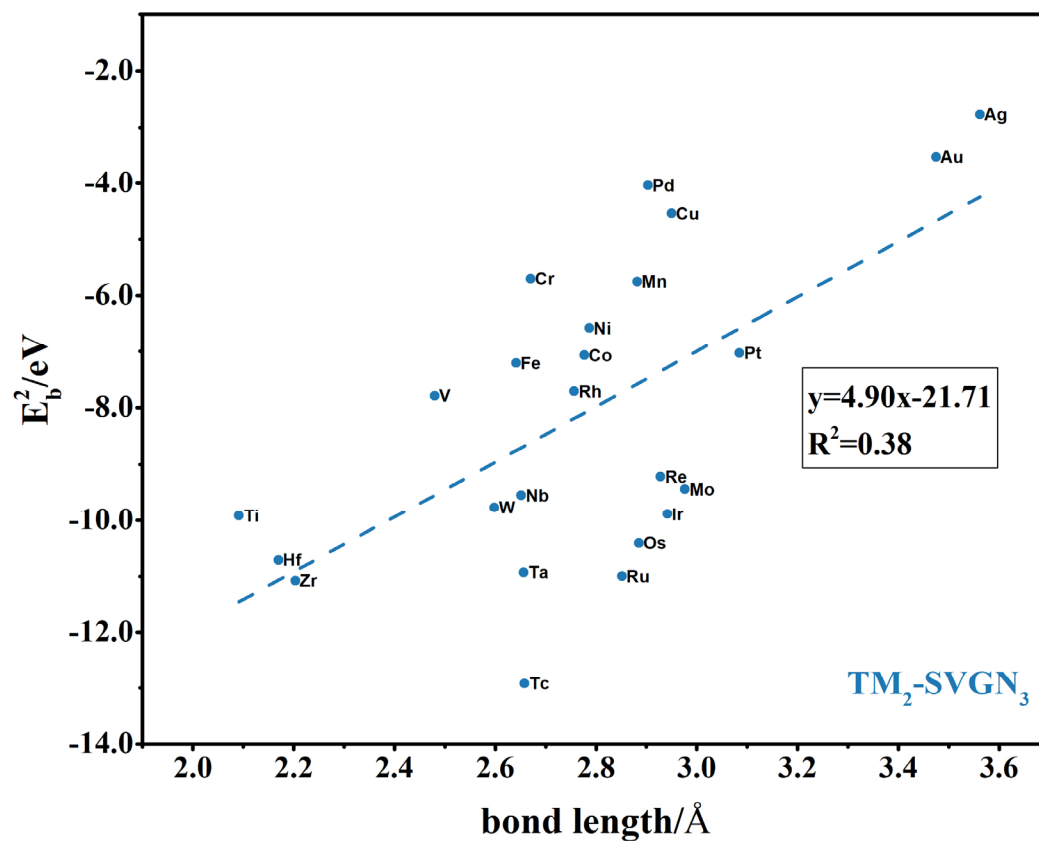

**Figure S4.** Correlation between the average distance ( $d_{\text{M1-Nx}}$  and  $d_{\text{M2-Nx}}$ ) from the dual-atoms (M1 and M2) to the N atom and binding energy ( $E_b^2$ ) in  $\text{TM}_2\text{-SVGN}_3$ .
